# Supplementary material
Source: Springer Nature journal article supplement (https://www.springermedizin.de/resource/supplementary/13000_2011_491_MOESM4_ESM.pdf/9624424)

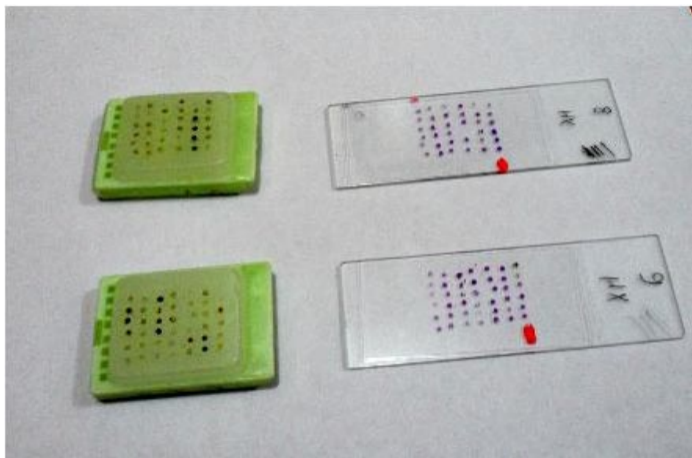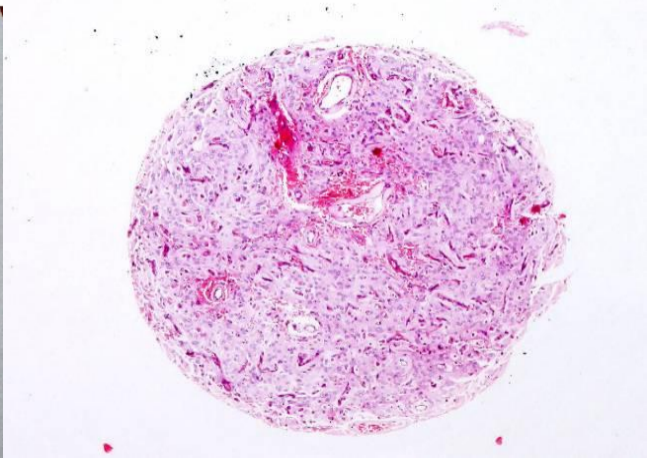

Supplement: MOESM4 [file 9624424]
